# Supplementary material for: Meals, Education, and Gardens for In-School Adolescents (MEGA): study protocol for a cluster randomised trial of an integrated adolescent nutrition intervention in Dodoma, Tanzania
Source: HighWire-hosted journal article supplement (doi:10.1136/bmjopen-2022-062085), 2022-07-01
Supplement: bmjopen-2022-062085supp001_data_supplement.pdf [file bmjopen-2022-062085supp001_data_supplement.pdf]

**Supplemental Table 1** Modules and topics to be covered in the adolescent nutrition education in the MEGA project, 2022

| Week    | Topic                                                            | Module                                            |                                                   |
|---------|------------------------------------------------------------------|---------------------------------------------------|---------------------------------------------------|
| Week 1  | The Dimensions of Health                                         | Module I:<br>Health and<br>nutrition              |                                                   |
| Week 2  | Overview of Good Nutrition                                       |                                                   |                                                   |
| Week 3  | Nutrition Through Life                                           |                                                   |                                                   |
| Week 4  | Fundamental Conditions for Good Nutritional Status               |                                                   |                                                   |
| Week 5  | Nutritional Needs of Adolescents                                 |                                                   |                                                   |
| Week 6  | Malnutrition: Poor Nutritional Status (Part I)                   |                                                   |                                                   |
| Week 7  | Malnutrition: Poor Nutritional Status (Part II)                  |                                                   |                                                   |
| Week 8  | Problems of Undernutrition                                       |                                                   |                                                   |
| Week 9  | Problems from a Lack of Vitamins and Minerals (Part I)           |                                                   |                                                   |
| Week 10 | Problems from a Lack of Vitamins and Minerals (Part II)          |                                                   |                                                   |
| Week 11 | Problems from a Lack of Vitamins and Minerals (Part III)         |                                                   |                                                   |
| Week 12 | Vitamins: Their Functions and Good Food Sources (Part I)         |                                                   |                                                   |
| Week 13 | Vitamins: Their Functions and Good Food Sources (Part II)        |                                                   |                                                   |
| Week 14 | Minerals: Their Functions and Good Food Sources (Part I)         |                                                   |                                                   |
| Week 15 | Minerals: Their Functions and Good Food Sources (Part II)        |                                                   |                                                   |
| Week 16 | Problems of “Overnutrition”                                      |                                                   | Module II:<br>Agriculture and<br>school gardening |
| Week 17 | Eating Habits and Healthy Diets (Part I)                         |                                                   |                                                   |
| Week 18 | Eating Habits and Healthy Diets (Part II)                        |                                                   |                                                   |
| Week 19 | Introduction to School Gardening                                 |                                                   |                                                   |
| Week 20 | Fertilizer Management                                            |                                                   |                                                   |
| Week 21 | Pesticides and Compost                                           |                                                   |                                                   |
| Week 22 | Activities Involved in School Gardening (Part I)                 | Module III:<br>Health benefits<br>of vegetables   |                                                   |
| Week 23 | Activities Involved in School Gardening (Part II)                |                                                   |                                                   |
| Week 24 | Health Benefits of Vegetables (Part I)                           |                                                   |                                                   |
| Week 25 | Health Benefits of Vegetables (Part II)                          |                                                   |                                                   |
| Week 26 | Health Benefits of Vegetables (Part III)                         | Module IV:<br>Physical activity<br>and body size  |                                                   |
| Week 27 | Identifying Common Vegetables                                    |                                                   |                                                   |
| Week 28 | Vegetable Planting Calendar in Tanzania                          | Module V:<br>Water,<br>sanitation, and<br>hygiene |                                                   |
| Week 29 | Achieving and Maintaining a Healthy Body Size (Part I)           |                                                   |                                                   |
| Week 30 | Achieving and Maintaining a Healthy Body Size (Part II)          |                                                   |                                                   |
| Week 31 | Being Fit and Active                                             |                                                   |                                                   |
| Week 32 | Overview of Water, Sanitation, and Hygiene (WASH)                |                                                   |                                                   |
| Week 33 | Food Quality and Safety in the Shops, Markets, Streets (Part I)  |                                                   |                                                   |
| Week 34 | Food Quality and Safety in the Shops, Markets, Streets (Part II) |                                                   |                                                   |
| Week 35 | Protecting the Quality and Safety of Food at Home                |                                                   |                                                   |
| Week 36 | Personal Hygiene: Keeping Our Bodies Clean (Part I)              |                                                   |                                                   |
| Week 37 | Personal Hygiene: Keeping Our Bodies Clean (Part II)             |                                                   |                                                   |
| Week 38 | Disease-Causing Microorganism                                    |                                                   |                                                   |
| Week 39 | Clean and Safe Water (Part I)                                    |                                                   |                                                   |
| Week 40 | Clean and Safe Water (Part II)                                   |                                                   |                                                   |
| Week 41 | Clean Living Conditions                                          |                                                   |                                                   |

**Supplemental Table 2** Topics and activities to be covered in the community workshops in the MEGA project, 2022

| Month    | Visit # | Review                                                       | Nutrition Messages                                               | Agriculture Messages                                                    | Activities                                                                                                                                                                                                                                                                                                                          |
|----------|---------|--------------------------------------------------------------|------------------------------------------------------------------|-------------------------------------------------------------------------|-------------------------------------------------------------------------------------------------------------------------------------------------------------------------------------------------------------------------------------------------------------------------------------------------------------------------------------|
| Month #1 | 1       | Introduction and answer questions about the study            | Food and water safety and hygiene; Food preservation and storage | Describe homestead gardening: economical, nutrition, and social aspects | <ul style="list-style-type: none"> <li>Treated water demonstration</li> </ul>                                                                                                                                                                                                                                                       |
|          | 2       | Review food and water safety and hygiene messages            | Deworming                                                        | Nursey preparation<br><br>Keyhole garden                                | <ul style="list-style-type: none"> <li>Draft deworming schedule for children and adolescents</li> <li>How to make vegetable nursery seedbed preparations</li> </ul>                                                                                                                                                                 |
| Month #2 | 3       | Review deworming messages                                    | Handwashing                                                      | Fertilizer management and different types of fertilizer                 | <ul style="list-style-type: none"> <li>Demonstrate appropriate handwashing techniques</li> <li>Preparing land (Clearing, destumping, cultivating, main bed preparation, and organic manure application)</li> <li>Seed sowing/planting of different types of seeds to the main field or direct sowing or container plants</li> </ul> |
|          | 4       | Review handwashing techniques                                | Key nutrition terms and importance of human nutrition            | Irrigation                                                              | <ul style="list-style-type: none"> <li>Review <i>MyPlate</i> Graphic</li> <li>Demonstration of irrigation techniques</li> </ul>                                                                                                                                                                                                     |
| Month #3 | 5       | Review key nutrition terms and importance of human nutrition | Balanced diet + food examples                                    | Agronomical practices                                                   | <ul style="list-style-type: none"> <li>Create a healthy meal plan with participants</li> <li>Management of vegetable crops</li> </ul>                                                                                                                                                                                               |
|          | 6       | Review balanced diet and food examples                       | Food equivalents to Meet Energy Needs                            | Pests and disease management<br><br>Harmful effects of pesticides       | <ul style="list-style-type: none"> <li>Ask participants to identify how many calories each household member needs</li> <li>Look at the garden to identify diseases and insects of crops</li> <li>Uproot and destroy the stalk/plants affected by diseases</li> </ul>                                                                |

|          |     |                                                                           |                                                                                   |                                                                                         |                                                                                                                                                                                                                                                           |
|----------|-----|---------------------------------------------------------------------------|-----------------------------------------------------------------------------------|-----------------------------------------------------------------------------------------|-----------------------------------------------------------------------------------------------------------------------------------------------------------------------------------------------------------------------------------------------------------|
| Month #4 | 7   | Review Food equivalents to meet energy needs                              | Causes and consequences of malnutrition                                           | Farm progress                                                                           | <ul style="list-style-type: none"> <li>• Create homemade ORS</li> <li>• Walk through the garden and identify plants suffering from mineral deficiency</li> <li>• Signs of vegetable maturity</li> </ul>                                                   |
|          | 8   | Review causes and consequences of malnutrition                            | Advantages of vitamin supplements, iron and folic acid supplementation, deworming | Crop harvesting                                                                         | <ul style="list-style-type: none"> <li>• Review if adolescents have been dewormed and received any vitamin supplement/iron and folic acid supplementation</li> <li>• Demonstrate proper harvesting</li> </ul>                                             |
| Month #5 | 9   | Review Vitamin supplement, iron and folic acid supplementation, deworming | Anemia: signs, symptoms, management                                               | Grading/ packaging of vegetables/ Marketing of vegetables                               | <ul style="list-style-type: none"> <li>• Demonstrate signs and symptoms of anemia</li> <li>• Preserving and marketing vegetables</li> </ul>                                                                                                               |
|          | 10  | Review signs and symptoms of anemia                                       | Menstruation and hygiene                                                          | Composting and keyhole garden                                                           | <ul style="list-style-type: none"> <li>• Demonstrate heap composting</li> <li>• Review how to create a keyhole garden</li> </ul>                                                                                                                          |
| Month #6 | 11  | Review menstruation and hygiene                                           | Food preservation and storage<br><br>Importance of good health-seeking behavior   | Nursery Preparation                                                                     | <ul style="list-style-type: none"> <li>• Show women how to make homemade oral rehydration salts</li> <li>• How to prepare a nursery</li> </ul>                                                                                                            |
|          | 12: | Review Health Seeking Behavior                                            | Importance of anthropometric measures                                             | Raised bed preparation                                                                  | <ul style="list-style-type: none"> <li>• Main bed preparation</li> </ul>                                                                                                                                                                                  |
| Month #7 | 13  | Review importance of anthropometric measures                              | Importance of iodized salt                                                        | Transplanting                                                                           | <ul style="list-style-type: none"> <li>• How to transplant vegetable crops and management</li> </ul>                                                                                                                                                      |
|          | 14  | Review importance of iodized salt                                         | Food preservation and storage                                                     | Controlling harmful insects and vegetable diseases<br><br>Harmful effects of pesticides | <ul style="list-style-type: none"> <li>• Go over proper preservation and storage techniques</li> <li>• Look at the garden to identify diseases and insects of crops</li> <li>• Uproot and destroy the stalk/plant affected as control measures</li> </ul> |
| Month #8 | 15  | Review food preservation and storage                                      | Key nutrition terms and importance of human nutrition                             | Farm progress                                                                           | <ul style="list-style-type: none"> <li>• Review <i>Healthy Eating Plate</i></li> <li>• Walk through the garden and identify plants suffering from mineral deficiency</li> <li>• Signs of vegetable maturity</li> </ul>                                    |

|           |    |                                                              |                                         |                                                           |                                                                                                                                                                                                |
|-----------|----|--------------------------------------------------------------|-----------------------------------------|-----------------------------------------------------------|------------------------------------------------------------------------------------------------------------------------------------------------------------------------------------------------|
|           | 16 | Review key nutrition terms and importance of human nutrition | Physical activity                       | Harvesting                                                | <ul style="list-style-type: none"> <li>• Demonstrate activities that can be considered physical activity such as walking, household chores</li> <li>• Demonstrate proper harvesting</li> </ul> |
| Month #9  | 17 | Review physical activity                                     | Causes and consequences of malnutrition | Grading/ packaging of vegetables/ Marketing of vegetables | <ul style="list-style-type: none"> <li>• Treated water demonstration</li> <li>• Preservation of vegetable crops for future use</li> <li>• Marketing of vegetables</li> </ul>                   |
|           | 18 | Review Causes and Consequences of malnutrition               | Handwashing                             | Nursery preparation                                       | <ul style="list-style-type: none"> <li>• How to prepare a nursery (review)</li> </ul>                                                                                                          |
| Month #10 | 19 | Review handwashing                                           | Cooking Demonstration                   | Raised bed preparation                                    | <ul style="list-style-type: none"> <li>• Conduct cooking demonstration on site</li> <li>• Main bed preparation</li> </ul>                                                                      |
|           | 20 | Review cooking demonstration                                 | Balanced diet                           | Transplanting                                             | <ul style="list-style-type: none"> <li>• How to transplant vegetable crops and management</li> </ul>                                                                                           |
